# Supplementary material
Source: PubMed Central journal article supplement (PMC7960317)
Supplement: 15-00958.pdf [file 15-00958.pdf]

**On-line Table: Summary of series conducted on the WEB device**

|                                                                   | Pierot et al, <sup>20</sup><br>Lubicz et al <sup>29</sup> | Pierot et al <sup>19</sup> | Liebig et al <sup>18</sup> | Bheme et al <sup>23</sup> | Caroff et al <sup>30</sup> | Pierot et al <sup>26</sup> |
|-------------------------------------------------------------------|-----------------------------------------------------------|----------------------------|----------------------------|---------------------------|----------------------------|----------------------------|
|                                                                   | Oct 2010 to<br>May 2012                                   | Nov 2012 to<br>Jan 2014    | May 2011 to<br>Dec 2013    | Apr 2012 to<br>Aug 2014   | Jun 2013 to<br>May 2014    | Dec 2011 to<br>Feb 2014    |
| Centers (No.)                                                     | 12                                                        | 10                         | 10                         | 2                         | 10                         | 10                         |
| Patients (No.)                                                    | 45                                                        | 62                         | 47                         | 52                        | 90                         | 51                         |
| Aneurysms (No.)                                                   | 45                                                        | 63                         | 52                         | 55                        | 98                         | 51                         |
| Mean IA size                                                      |                                                           |                            |                            |                           |                            |                            |
| Width (mm)                                                        | NA                                                        | NA                         | NA                         | 7 <sup>a</sup>            | 8.9                        | 8.2                        |
| Dome (mm)                                                         | NA                                                        | NA                         | NA                         | 7 <sup>a</sup>            | NA                         | NA                         |
| Neck (mm)                                                         | NA                                                        | NA                         | 4.7                        | 5 <sup>a</sup>            | 5.2                        | 5.6                        |
| Depth/neck (mm)                                                   | NA                                                        | NA                         | NA                         | NA                        | 1.6                        | NA                         |
| Aneurysm size <10/≥10 mm (%/%)                                    | 96/4                                                      | 83/17                      | 87/13                      | NA                        | NA                         | 80/20                      |
| Neck size <4/≥4 mm (%/%)                                          | 0/100                                                     | 10/90                      | 6/94                       | 20/80                     | NA                         | 0/100                      |
| Main locations of IA                                              |                                                           |                            |                            |                           |                            |                            |
| MCA                                                               | 26 (58)                                                   | 32 (51)                    | 18 (35)                    | 19 (37)                   | 38 (39)                    | 29 (57)                    |
| AcomA                                                             | 5 (11)                                                    | 16 (25)                    | 17 (33)                    | 9 (18)                    | 21 (21)                    | 4 (8)                      |
| BA                                                                | 11 (24)                                                   | 9 (14)                     | 8 (15)                     | 10 (20)                   | 19 (19)                    | 12 (24)                    |
| ICA                                                               | 1 (2)                                                     | 6 (10)                     | 2 (4)                      | 4 (6)                     | 15 (15)                    | 6 (12)                     |
| Ruptured (No.) (%)                                                | 3 (7)                                                     | 7 (11)                     | 52 (100)                   | 14 (25)                   | 33 (34)                    | 3 (6)                      |
| Failed implantation (No.)                                         | 0 (0)                                                     | 1 (2)                      | 0 (0)                      | 4 (7)                     | 5 (5)                      | 3 (6)                      |
| WEB-DL/WEB-SL (%/%)                                               | 100/0                                                     | 49/51                      | 71/29                      | NA                        | 0/100                      | 100/0                      |
| Additional treatment (No.) (%)                                    | 5 (11)                                                    | 7 (11)                     | 8 (15)                     | NA                        | 12 (13)                    | 4 (8)                      |
| Complications (No.) (%)                                           | 5 (11)                                                    | 16 (25)                    | 16 (34)                    | 6 (12)                    | 13 (14)                    | 11 (22)                    |
| Main complication (No.) (%)                                       | TE, <sup>b</sup> 4 (9)                                    | TE, 10 (16)                | TE, 5 (11)                 | TE, 4 (8)                 | TE, 6 (7)                  | TE, 9 (18)                 |
| Postprocedural antiplatelet therapy,<br>none/single/dual (%/%%/%) | NA                                                        | 23/50/27                   | 31/51/18                   | NA                        | 33/NA/NA                   | 16/63/22                   |
| Time at last clinical follow-up (mo)                              | NA                                                        | 1                          | Discharge                  | Discharge                 | 3.8 <sup>c</sup>           | 6                          |
| mRS >1 at last follow-up (%)                                      | 6.7                                                       | 3.2                        | NA                         | 5.9                       | 2.2                        | 6.2                        |
| Mortality at last follow-up (%)                                   | 2.2                                                       | 0                          | 17.0                       | 5.9                       | 1.1                        | 4.2                        |
| Angiographic follow-up (mo)                                       | 27.4 <sup>a</sup>                                         | NA                         | 4                          | 3.3                       | 3.3                        | 6                          |
| Adequate occlusion at last follow-up (%)                          | 84.2                                                      | NA                         | 80                         | 66                        | 65                         | 85.4                       |

**Note:**—IA indicates intracranial aneurysms; AcomA, anterior communicating artery; BA, basilar artery; NA, not applicable; TE, thromboembolic.

<sup>a</sup> Median.

<sup>b</sup> Thromboembolic.

<sup>c</sup> Average follow-up time.
